# Supplementary material
Source: PubMed Central journal article supplement (PMC2764725)

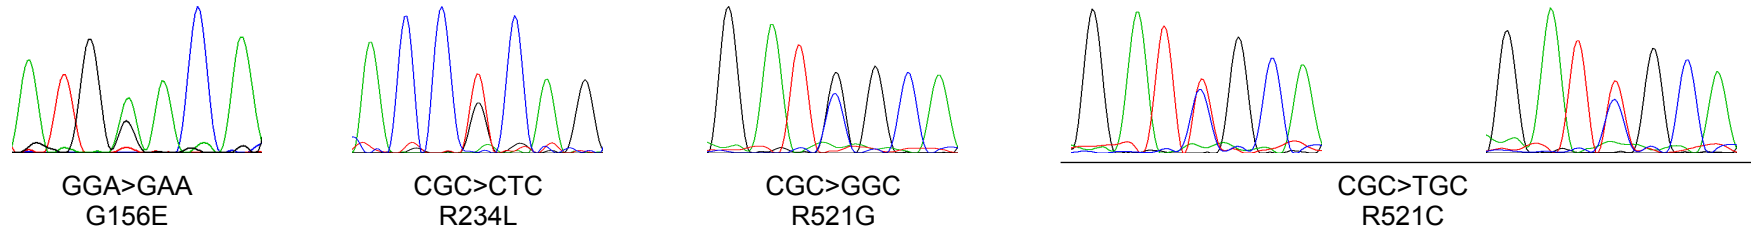

**Figure e-1** - Chromatograms displaying the four *FUS* mutations identified in our FALS cohort

Supplement: WNL.0b013e3181bbff05_1.pdf [file WNL.0b013e3181bbff05_1.pdf]
